# Supplementary material for: Heavy ion beam-induced variation in salt tolerance among Leymus chinensis genotypes during seed germination
Source: PeerJ. 2025 Dec 17;13:e20510. doi: 10.7717/peerj.20510 (PMC12717846; doi:10.7717/peerj.20510)
Supplement: Supplemental Information 1 — Genotype-level measurements across all radiation dose and salt stress treatments. Data were used for LD50 calculation and resistance classification. [file peerj-13-20510-s001.xlsx]

## Sheet: Sheet1
Genotypes	Treatments	irradiation dose(Gy)	emergence percentage (%)	germination percentages (%)
G1	CK	0	65	70
G1	CK	0	50	65
G1	CK	0	65	70
G1	CK	0	50	60
G1	CK	40	45	55
G1	CK	40	30	45
G1	CK	40	50	60
G1	CK	40	45	75
G1	CK	50	20	65
G1	CK	50	50	60
G1	CK	50	40	65
G1	CK	50	30	80
G1	CK	80	40	80
G1	CK	80	45	55
G1	CK	80	35	70
G1	CK	80	70	75
G1	NaCl	0	70	75
G1	NaCl	0	85	90
G1	NaCl	0	80	85
G1	NaCl	0	70	70
G1	NaCl	40	50	70
G1	NaCl	40	30	40
G1	NaCl	40	35	65
G1	NaCl	40	10	65
G1	NaCl	50	40	70
G1	NaCl	50	45	70
G1	NaCl	50	30	60
G1	NaCl	50	20	70
G1	NaCl	80	40	75
G1	NaCl	80	40	80
G1	NaCl	80	60	70
G1	NaCl	80	55	70
G2	CK	0	40	45
G2	CK	0	15	25
G2	CK	0	55	55
G2	CK	0	55	60
G2	CK	40	10	25
G2	CK	40	25	35
G2	CK	40	20	35
G2	CK	40	50	60
G2	CK	50	10	35
G2	CK	50	5	10
G2	CK	50	35	55
G2	CK	50	20	30
G2	CK	80	0	35
G2	CK	80	5	10
G2	CK	80	10	40
G2	CK	80	10	35
G2	NaCl	0	60	70
G2	NaCl	0	40	45
G2	NaCl	0	65	60
G2	NaCl	0	65	65
G2	NaCl	40	35	40
G2	NaCl	40	10	15
G2	NaCl	40	25	30
G2	NaCl	40	25	40
G2	NaCl	50	20	35
G2	NaCl	50	20	40
G2	NaCl	50	10	25
G2	NaCl	50	5	20
G2	NaCl	80	15	20
G2	NaCl	80	10	35
G2	NaCl	80	0	0
G2	NaCl	80	10	15
G3	CK	0	45	45
G3	CK	0	55	55
G3	CK	0	45	30
G3	CK	0	30	45
G3	CK	40	25	25
G3	CK	40	30	30
G3	CK	40	0	15
G3	CK	40	30	60
G3	CK	50	35	45
G3	CK	50	45	55
G3	CK	50	45	70
G3	CK	50	30	60
G3	CK	80	25	50
G3	CK	80	35	70
G3	CK	80	35	45
G3	CK	80	25	45
G3	NaCl	0	50	55
G3	NaCl	0	45	45
G3	NaCl	0	55	55
G3	NaCl	0	50	55
G3	NaCl	40	15	20
G3	NaCl	40	20	30
G3	NaCl	40	20	45
G3	NaCl	40	20	30
G3	NaCl	50	35	70
G3	NaCl	50	40	65
G3	NaCl	50	20	70
G3	NaCl	50	15	50
G3	NaCl	80	40	80
G3	NaCl	80	20	70
G3	NaCl	80	30	65
G3	NaCl	80	5	35
G4	CK	0	65	65
G4	CK	0	75	80
G4	CK	0	70	75
G4	CK	0	85	90
G4	CK	40	20	70
G4	CK	40	15	80
G4	CK	40	25	50
G4	CK	40	40	95
G4	CK	50	15	45
G4	CK	50	20	50
G4	CK	50	25	50
G4	CK	50	25	65
G4	CK	80	10	50
G4	CK	80	15	50
G4	CK	80	5	55
G4	CK	80	15	50
G4	NaCl	0	50	60
G4	NaCl	0	65	75
G4	NaCl	0	70	80
G4	NaCl	0	50	70
G4	NaCl	40	45	70
G4	NaCl	40	15	50
G4	NaCl	40	35	65
G4	NaCl	40	15	45
G4	NaCl	50	25	55
G4	NaCl	50	25	65
G4	NaCl	50	20	55
G4	NaCl	50	25	65
G4	NaCl	80	10	45
G4	NaCl	80	10	55
G4	NaCl	80	5	40
G4	NaCl	80	10	60
G5	CK	0	30	50
G5	CK	0	65	70
G5	CK	0	30	40
G5	CK	0	60	60
G5	CK	40	15	30
G5	CK	40	35	60
G5	CK	40	40	60
G5	CK	40	10	55
G5	CK	50	25	70
G5	CK	50	30	60
G5	CK	50	30	40
G5	CK	50	30	60
G5	CK	80	30	65
G5	CK	80	0	30
G5	CK	80	10	50
G5	CK	80	20	60
G5	NaCl	0	40	45
G5	NaCl	0	35	65
G5	NaCl	0	30	40
G5	NaCl	0	25	25
G5	NaCl	40	20	35
G5	NaCl	40	55	60
G5	NaCl	40	5	35
G5	NaCl	40	10	20
G5	NaCl	50	10	60
G5	NaCl	50	25	50
G5	NaCl	50	10	40
G5	NaCl	50	15	35
G5	NaCl	80	20	50
G5	NaCl	80	10	45
G5	NaCl	80	10	25
G5	NaCl	80	20	70
G6	CK	0	35	40
G6	CK	0	55	60
G6	CK	0	50	70
G6	CK	0	60	60
G6	CK	40	45	50
G6	CK	40	40	40
G6	CK	40	25	50
G6	CK	40	65	75
G6	CK	50	40	85
G6	CK	50	50	80
G6	CK	50	30	85
G6	CK	50	50	75
G6	CK	80	30	60
G6	CK	80	15	90
G6	CK	80	10	75
G6	CK	80	30	65
G6	NaCl	0	55	55
G6	NaCl	0	50	65
G6	NaCl	0	55	70
G6	NaCl	0	40	50
G6	NaCl	40	10	55
G6	NaCl	40	30	45
G6	NaCl	40	40	50
G6	NaCl	40	15	35
G6	NaCl	50	20	55
G6	NaCl	50	30	65
G6	NaCl	50	25	55
G6	NaCl	50	10	40
G6	NaCl	80	5	55
G6	NaCl	80	15	50
G6	NaCl	80	25	70
G6	NaCl	80	25	70
G7	CK	0	20	50
G7	CK	0	10	30
G7	CK	0	10	30
G7	CK	0	15	35
G7	CK	40	10	35
G7	CK	40	10	35
G7	CK	40	15	40
G7	CK	40	10	40
G7	CK	50	0	25
G7	CK	50	0	5
G7	CK	50	0	25
G7	CK	50	0	20
G7	CK	80	0	5
G7	CK	80	0	0
G7	CK	80	0	0
G7	CK	80	0	5
G7	NaCl	0	5	5
G7	NaCl	0	0	5
G7	NaCl	0	0	5
G7	NaCl	0	0	0
G7	NaCl	40	20	20
G7	NaCl	40	0	0
G7	NaCl	40	0	30
G7	NaCl	40	0	10
G7	NaCl	50	5	25
G7	NaCl	50	10	10
G7	NaCl	50	0	5
G7	NaCl	50	5	10
G7	NaCl	80	0	5
G7	NaCl	80	0	15
G7	NaCl	80	0	10
G7	NaCl	80	0	10
G8	CK	0	35	40
G8	CK	0	60	70
G8	CK	0	55	55
G8	CK	0	55	70
G8	CK	40	25	50
G8	CK	40	70	75
G8	CK	40	55	60
G8	CK	40	45	85
G8	CK	50	45	60
G8	CK	50	55	70
G8	CK	50	45	60
G8	CK	50	65	65
G8	CK	80	50	80
G8	CK	80	55	70
G8	CK	80	45	65
G8	CK	80	60	70
G8	NaCl	0	40	40
G8	NaCl	0	80	85
G8	NaCl	0	45	45
G8	NaCl	0	60	75
G8	NaCl	40	100	100
G8	NaCl	40	65	65
G8	NaCl	40	60	60
G8	NaCl	40	65	75
G8	NaCl	50	35	65
G8	NaCl	50	55	70
G8	NaCl	50	55	55
G8	NaCl	50	40	50
G8	NaCl	80	25	50
G8	NaCl	80	20	50
G8	NaCl	80	25	80
G8	NaCl	80	15	40
G9	CK	0	25	40
G9	CK	0	25	45
G9	CK	0	10	15
G9	CK	0	15	35
G9	CK	40	5	15
G9	CK	40	10	45
G9	CK	40	5	30
G9	CK	40	5	50
G9	CK	50	10	35
G9	CK	50	10	75
G9	CK	50	5	25
G9	CK	50	10	50
G9	CK	80	5	40
G9	CK	80	10	60
G9	CK	80	0	35
G9	CK	80	15	65
G9	NaCl	0	5	25
G9	NaCl	0	10	20
G9	NaCl	0	20	30
G9	NaCl	0	35	35
G9	NaCl	40	5	35
G9	NaCl	40	10	45
G9	NaCl	40	15	20
G9	NaCl	40	10	25
G9	NaCl	50	5	30
G9	NaCl	50	0	20
G9	NaCl	50	0	35
G9	NaCl	50	5	25
G9	NaCl	80	0	25
G9	NaCl	80	0	50
G9	NaCl	80	0	50
G9	NaCl	80	10	55
