# Supplementary material for: Heavy ion beam-induced variation in salt tolerance among Leymus chinensis genotypes during seed germination
Source: PeerJ. 2025 Dec 17;13:e20510. doi: 10.7717/peerj.20510 (PMC12717846; doi:10.7717/peerj.20510)
Supplement: Supplemental Information 2 — Individual root length measurements of Leymus chinensis seedlings under different genotype × dose × stress combinations, used for phenotypic response analysis. [file peerj-13-20510-s002.xlsx]

## Sheet: Sheet1
Genotypes	Treatments	irradiation dose(Gy)	Root length (cm)
G1	CK	0	6.8
G1	CK	0	4.5
G1	CK	0	6.7
G1	CK	0	7.6
G1	CK	0	6.2
G1	CK	0	6.5
G1	CK	0	6.5
G1	CK	0	4.6
G1	CK	0	5.9
G1	CK	0	9.2
G1	CK	0	8.9
G1	CK	0	7.3
G1	CK	0	7.5
G1	CK	0	8.2
G1	CK	0	5.6
G1	CK	0	6.7
G1	CK	0	7.4
G1	CK	0	5.8
G1	CK	0	6.5
G1	CK	0	4.3
G1	CK	0	6.9
G1	CK	0	6.7
G1	CK	0	7
G1	CK	0	6.6
G1	CK	40	1.5
G1	CK	40	5.4
G1	CK	40	3
G1	CK	40	2.3
G1	CK	40	1.3
G1	CK	40	3.5
G1	CK	50	2.5
G1	CK	50	4.2
G1	CK	50	3.8
G1	CK	50	2
G1	CK	50	1.5
G1	CK	50	2.8
G1	CK	80	5
G1	CK	80	3.5
G1	CK	80	6.2
G1	CK	80	3.7
G1	CK	80	4.5
G1	CK	80	7.7
G1	CK	80	4.3
G1	CK	80	3.6
G1	CK	80	3
G1	NaCl	0	10.2
G1	NaCl	0	8.8
G1	NaCl	0	1.2
G1	NaCl	0	6
G1	NaCl	0	6.3
G1	NaCl	0	10.3
G1	NaCl	0	9.9
G1	NaCl	0	7.5
G1	NaCl	0	7.2
G1	NaCl	0	7.5
G1	NaCl	0	6
G1	NaCl	0	8.7
G1	NaCl	0	7
G1	NaCl	0	10.5
G1	NaCl	0	6.2
G1	NaCl	0	8.2
G1	NaCl	0	7
G1	NaCl	0	5.5
G1	NaCl	0	9.3
G1	NaCl	0	9.9
G1	NaCl	40	0.8
G1	NaCl	40	1.1
G1	NaCl	40	1.5
G1	NaCl	40	1
G1	NaCl	40	4.3
G1	NaCl	40	1.7
G1	NaCl	40	0.5
G1	NaCl	40	0.4
G1	NaCl	50	3.7
G1	NaCl	50	2
G1	NaCl	50	2.7
G1	NaCl	50	6.2
G1	NaCl	50	3.4
G1	NaCl	50	2.7
G1	NaCl	50	4.1
G1	NaCl	80	0
G2	CK	0	5.1
G2	CK	0	4.8
G2	CK	0	6.1
G2	CK	0	3.2
G2	CK	0	5.5
G2	CK	0	6.5
G2	CK	0	5
G2	CK	0	6.7
G2	CK	0	4.3
G2	CK	0	5.5
G2	CK	0	5.6
G2	CK	0	5
G2	CK	0	4.8
G2	CK	0	4.8
G2	CK	0	5.9
G2	CK	0	4
G2	CK	0	4.6
G2	CK	0	7.5
G2	CK	0	4.5
G2	CK	0	4.2
G2	CK	0	10.5
G2	CK	0	2.8
G2	CK	0	7
G2	CK	0	8.2
G2	CK	0	6.7
G2	CK	0	6.8
G2	CK	0	6
G2	CK	0	6.8
G2	CK	0	6.3
G2	CK	40	4.7
G2	CK	40	5.5
G2	CK	40	0.2
G2	CK	50	1.7
G2	CK	50	1.3
G2	CK	50	2.5
G2	CK	50	2
G2	CK	50	3.4
G2	CK	50	0.3
G2	CK	80	0
G2	NaCl	0	6.6
G2	NaCl	0	7.5
G2	NaCl	0	6.3
G2	NaCl	0	9.3
G2	NaCl	0	7.8
G2	NaCl	0	5.6
G2	NaCl	0	7
G2	NaCl	0	7.1
G2	NaCl	0	6.5
G2	NaCl	0	8.2
G2	NaCl	0	4.9
G2	NaCl	0	7.4
G2	NaCl	0	6.5
G2	NaCl	0	3.5
G2	NaCl	0	8.2
G2	NaCl	0	6.5
G2	NaCl	0	10.8
G2	NaCl	0	5.1
G2	NaCl	0	8.5
G2	NaCl	40	3.3
G2	NaCl	40	1.7
G2	NaCl	40	1.9
G2	NaCl	50	3.5
G2	NaCl	50	1.5
G2	NaCl	50	4.6
G2	NaCl	50	3.4
G2	NaCl	50	1.2
G2	NaCl	50	0.9
G2	NaCl	80	1.8
G2	NaCl	80	2.5
G2	NaCl	80	2.9
G3	CK	0	6.7
G3	CK	0	6.1
G3	CK	0	5.4
G3	CK	0	5.3
G3	CK	0	6.2
G3	CK	0	8.2
G3	CK	0	10.5
G3	CK	0	7.7
G3	CK	0	8.3
G3	CK	0	7.9
G3	CK	0	5.1
G3	CK	0	4.5
G3	CK	0	11
G3	CK	0	6.3
G3	CK	0	7.3
G3	CK	0	5.2
G3	CK	0	4.6
G3	CK	0	3.5
G3	CK	0	2.7
G3	CK	40	4
G3	CK	40	5.3
G3	CK	40	1.6
G3	CK	40	0.2
G3	CK	40	0.2
G3	CK	40	3.5
G3	CK	40	0.9
G3	CK	40	1.3
G3	CK	40	1.6
G3	CK	40	2.1
G3	CK	50	3
G3	CK	50	3
G3	CK	50	6.7
G3	CK	50	4.6
G3	CK	50	2.5
G3	CK	50	0.7
G3	CK	50	1.8
G3	CK	50	10.5
G3	CK	50	2.1
G3	CK	50	5.3
G3	CK	50	1.6
G3	CK	50	0.7
G3	CK	50	5.2
G3	CK	80	0
G3	NaCl	0	8
G3	NaCl	0	4
G3	NaCl	0	5.5
G3	NaCl	0	4.8
G3	NaCl	0	4
G3	NaCl	0	6.8
G3	NaCl	0	6
G3	NaCl	0	3.3
G3	NaCl	0	3.5
G3	NaCl	0	6
G3	NaCl	0	4.3
G3	NaCl	0	4.5
G3	NaCl	0	7.5
G3	NaCl	0	6.9
G3	NaCl	0	4
G3	NaCl	0	7
G3	NaCl	0	9
G3	NaCl	0	8.2
G3	NaCl	0	5
G3	NaCl	0	7.7
G3	NaCl	0	6.3
G3	NaCl	0	6.5
G3	NaCl	0	4.2
G3	NaCl	0	3.8
G3	NaCl	0	7.2
G3	NaCl	0	7.3
G3	NaCl	0	9
G3	NaCl	0	5.2
G3	NaCl	0	6.2
G3	NaCl	40	2.3
G3	NaCl	40	3.1
G3	NaCl	40	1.5
G3	NaCl	40	2.7
G3	NaCl	40	0.8
G3	NaCl	40	0.1
G3	NaCl	40	0.1
G3	NaCl	40	3
G3	NaCl	40	0.7
G3	NaCl	40	0.7
G3	NaCl	40	0.4
G3	NaCl	40	0.5
G3	NaCl	50	3
G3	NaCl	50	0.8
G3	NaCl	50	0.9
G3	NaCl	50	6.7
G3	NaCl	50	8
G3	NaCl	80	0
G4	CK	0	9.5
G4	CK	0	8.1
G4	CK	0	8.6
G4	CK	0	6.6
G4	CK	0	7.5
G4	CK	0	8.6
G4	CK	0	10.5
G4	CK	0	10.4
G4	CK	0	9.5
G4	CK	0	8.1
G4	CK	0	10.5
G4	CK	0	7.8
G4	CK	0	9
G4	CK	0	5.8
G4	CK	0	6.7
G4	CK	0	6.2
G4	CK	0	7.7
G4	CK	0	5.5
G4	CK	0	7.3
G4	CK	0	5.6
G4	CK	0	8.5
G4	CK	0	8.5
G4	CK	0	7.7
G4	CK	40	1.8
G4	CK	40	3
G4	CK	40	6.8
G4	CK	40	1.3
G4	CK	40	0.5
G4	CK	50	4.1
G4	CK	50	5.3
G4	CK	50	0.3
G4	CK	50	0
G4	CK	80	0.5
G4	NaCl	0	4.8
G4	NaCl	0	7
G4	NaCl	0	4.5
G4	NaCl	0	7.2
G4	NaCl	0	5
G4	NaCl	0	4.7
G4	NaCl	0	10.5
G4	NaCl	0	7.1
G4	NaCl	0	6.3
G4	NaCl	0	5.9
G4	NaCl	0	4
G4	NaCl	0	7
G4	NaCl	0	7.1
G4	NaCl	0	7.9
G4	NaCl	0	4.7
G4	NaCl	0	8.5
G4	NaCl	0	7.3
G4	NaCl	0	5.4
G4	NaCl	0	6.2
G4	NaCl	0	5.3
G4	NaCl	0	3.6
G4	NaCl	40	4.1
G4	NaCl	40	1.4
G4	NaCl	40	1.7
G4	NaCl	40	3
G4	NaCl	40	0.2
G4	NaCl	50	5
G4	NaCl	50	3.1
G4	NaCl	50	3.8
G4	NaCl	50	3.1
G4	NaCl	50	0.1
G4	NaCl	50	1.6
G4	NaCl	50	0.5
G4	NaCl	50	5.2
G4	NaCl	50	0.2
G4	NaCl	50	3
G4	NaCl	80	0.4
G4	NaCl	80	4.5
G4	NaCl	80	3.6
G5	CK	0	5.3
G5	CK	0	5.3
G5	CK	0	3.5
G5	CK	0	5.7
G5	CK	0	1.8
G5	CK	0	5.2
G5	CK	0	5.1
G5	CK	0	3.6
G5	CK	0	4.9
G5	CK	0	3.4
G5	CK	0	4.4
G5	CK	0	4.3
G5	CK	0	6.2
G5	CK	0	3.8
G5	CK	0	2.7
G5	CK	0	3.5
G5	CK	0	5.8
G5	CK	0	6.8
G5	CK	0	3.7
G5	CK	0	6.5
G5	CK	0	5.9
G5	CK	40	3
G5	CK	50	2.2
G5	CK	50	0.2
G5	CK	50	0.3
G5	CK	50	0.1
G5	CK	80	0
G5	NaCl	0	6.2
G5	NaCl	0	4.4
G5	NaCl	0	3.3
G5	NaCl	0	4.9
G5	NaCl	0	6
G5	NaCl	0	5.5
G5	NaCl	0	5.3
G5	NaCl	0	5.2
G5	NaCl	0	4.8
G5	NaCl	0	3.3
G5	NaCl	0	1.6
G5	NaCl	0	7.2
G5	NaCl	0	4.4
G5	NaCl	0	3.5
G5	NaCl	0	8.8
G5	NaCl	0	5.3
G5	NaCl	0	3.4
G5	NaCl	0	2.7
G5	NaCl	0	1.5
G5	NaCl	40	1.5
G5	NaCl	50	1.1
G5	NaCl	50	1.8
G5	NaCl	80	1.7
G6	CK	0	7.8
G6	CK	0	6.2
G6	CK	0	8.1
G6	CK	0	8.9
G6	CK	0	4.5
G6	CK	0	7.2
G6	CK	0	4.2
G6	CK	0	7.3
G6	CK	0	8.3
G6	CK	0	5
G6	CK	0	8
G6	CK	0	7.5
G6	CK	0	6.9
G6	CK	0	4
G6	CK	0	7.5
G6	CK	0	4
G6	CK	0	6.5
G6	CK	0	9.5
G6	CK	0	5.4
G6	CK	0	4
G6	CK	0	6.2
G6	CK	0	6
G6	CK	0	7.1
G6	CK	0	7.4
G6	CK	0	2.7
G6	CK	0	4.4
G6	CK	0	2.8
G6	CK	0	1.7
G6	CK	0	4.7
G6	CK	0	10.8
G6	CK	0	11.4
G6	CK	0	6.2
G6	CK	0	7
G6	CK	0	4.3
G6	CK	40	2.2
G6	CK	40	1.4
G6	CK	40	0.3
G6	CK	40	0.2
G6	CK	40	3
G6	CK	40	2.9
G6	CK	50	0.8
G6	CK	50	2
G6	CK	50	5.5
G6	CK	50	1.4
G6	CK	50	2.3
G6	CK	50	0.2
G6	CK	50	5.8
G6	CK	50	3.3
G6	CK	50	7.8
G6	CK	50	5.5
G6	CK	50	3
G6	CK	50	0.4
G6	CK	80	1
G6	NaCl	0	5.7
G6	NaCl	0	4.5
G6	NaCl	0	9.2
G6	NaCl	0	8.5
G6	NaCl	0	10.3
G6	NaCl	0	7.4
G6	NaCl	0	6.9
G6	NaCl	0	8.4
G6	NaCl	0	5.1
G6	NaCl	0	8.5
G6	NaCl	0	7.7
G6	NaCl	0	1.7
G6	NaCl	0	6.5
G6	NaCl	0	4.6
G6	NaCl	0	4
G6	NaCl	0	6.8
G6	NaCl	0	7
G6	NaCl	0	8
G6	NaCl	0	8
G6	NaCl	0	4
G6	NaCl	0	3.8
G6	NaCl	40	2.6
G6	NaCl	40	2.2
G6	NaCl	50	9.8
G6	NaCl	50	6
G6	NaCl	50	5
G6	NaCl	50	2.6
G6	NaCl	50	3.6
G6	NaCl	80	0
G7	CK	0	6.1
G7	CK	0	5.5
G7	CK	0	7.7
G7	CK	0	5
G7	CK	0	2
G7	CK	0	5
G7	CK	0	6
G7	CK	0	3
G7	CK	0	4
G7	CK	0	5.3
G7	CK	0	5.5
G7	CK	0	4.2
G7	CK	0	6.4
G7	CK	0	5.5
G7	CK	0	4.3
G7	CK	0	1.5
G7	CK	40	0
G7	CK	50	0
G7	CK	80	0
G8	CK	0	6.1
G8	CK	0	5.5
G8	CK	0	8.2
G8	CK	0	7.4
G8	CK	0	8.2
G8	CK	0	8.6
G8	CK	0	6.6
G8	CK	0	7.1
G8	CK	0	8.1
G8	CK	0	6
G8	CK	0	4.3
G8	CK	0	4.3
G8	CK	0	7.6
G8	CK	0	4.4
G8	CK	0	7.8
G8	CK	0	10.8
G8	CK	0	3.2
G8	CK	0	9.3
G8	CK	0	7
G8	CK	0	4.7
G8	CK	0	10.3
G8	CK	40	1
G8	CK	40	2.3
G8	CK	40	0.5
G8	CK	40	0.4
G8	CK	40	0.2
G8	CK	40	0.2
G8	CK	40	1.5
G8	CK	40	1.4
G8	CK	40	0.5
G8	CK	40	0.1
G8	CK	40	0.4
G8	CK	40	0.2
G8	CK	40	3.9
G8	CK	40	1
G8	CK	40	1.3
G8	CK	40	3
G8	CK	40	1.5
G8	CK	50	2.6
G8	CK	50	2.7
G8	CK	50	2
G8	CK	50	0.8
G8	CK	50	0.7
G8	CK	50	3.7
G8	CK	50	1.7
G8	CK	50	1.7
G8	CK	50	0.1
G8	CK	50	0.1
G8	CK	50	0.8
G8	CK	80	2.3
G8	CK	80	5.3
G8	CK	80	3.2
G8	CK	80	2
G8	CK	80	3.9
G8	CK	80	5.5
G8	CK	80	2
G8	CK	80	5.4
G8	CK	80	3.5
G8	CK	80	2.8
G8	CK	80	3.2
G8	CK	80	2.5
G8	CK	80	3
G8	NaCl	0	5.3
G8	NaCl	0	6.6
G8	NaCl	0	8.7
G8	NaCl	0	5.1
G8	NaCl	0	2.1
G8	NaCl	0	7
G8	NaCl	0	10.7
G8	NaCl	0	6.7
G8	NaCl	0	7
G8	NaCl	0	5.6
G8	NaCl	0	3.7
G8	NaCl	0	7
G8	NaCl	0	4.8
G8	NaCl	0	6
G8	NaCl	0	5.8
G8	NaCl	0	2
G8	NaCl	0	4.2
G8	NaCl	0	5.3
G8	NaCl	0	2.6
G8	NaCl	0	7.1
G8	NaCl	0	6.5
G8	NaCl	0	4.7
G8	NaCl	0	9
G8	NaCl	0	3.7
G8	NaCl	0	3.3
G8	NaCl	0	1.8
G8	NaCl	0	5.6
G8	NaCl	0	7.9
G8	NaCl	0	5.7
G8	NaCl	0	8.7
G8	NaCl	0	8.9
G8	NaCl	0	5.3
G8	NaCl	40	4.5
G8	NaCl	40	2.9
G8	NaCl	40	4.1
G8	NaCl	40	2.4
G8	NaCl	40	1
G8	NaCl	40	1.2
G8	NaCl	40	4.2
G8	NaCl	40	2
G8	NaCl	40	4.3
G8	NaCl	40	1
G8	NaCl	40	3.1
G8	NaCl	40	2.8
G8	NaCl	40	1.3
G8	NaCl	40	4.2
G8	NaCl	40	0.2
G8	NaCl	40	0.3
G8	NaCl	50	3.1
G8	NaCl	50	2
G8	NaCl	50	4.4
G8	NaCl	50	7.8
G8	NaCl	50	3.8
G8	NaCl	50	1.3
G8	NaCl	50	6.7
G8	NaCl	50	2.3
G8	NaCl	50	8
G8	NaCl	50	0.3
G8	NaCl	50	5.5
G8	NaCl	50	4.5
G8	NaCl	50	0.2
G8	NaCl	80	0
G9	CK	0	6.6
G9	CK	0	3.6
G9	CK	0	6.5
G9	CK	0	6.2
G9	CK	0	5.3
G9	CK	0	1.6
G9	CK	0	2.2
G9	CK	0	2.8
G9	CK	0	4.1
G9	CK	0	5.8
G9	CK	0	2.2
G9	CK	0	0.6
G9	CK	0	6
G9	CK	0	8.5
G9	CK	0	7
G9	CK	0	3.2
G9	CK	40	0.5
G9	CK	50	1.7
G9	CK	80	0
G9	NaCl	0	1.4
G9	NaCl	0	5.2
G9	NaCl	0	2.7
G9	NaCl	0	7.5
G9	NaCl	0	9.5
G9	NaCl	0	4.6
G9	NaCl	0	3.7
G9	NaCl	0	4.3
G9	NaCl	0	2.8
G9	NaCl	0	0.3
G9	NaCl	40	1.5
G9	NaCl	40	2.7
G9	NaCl	40	0.2
G9	NaCl	50	2.4
G9	NaCl	80	0
