# Supplementary material for: Heavy ion beam-induced variation in salt tolerance among Leymus chinensis genotypes during seed germination
Source: PeerJ. 2025 Dec 17;13:e20510. doi: 10.7717/peerj.20510 (PMC12717846; doi:10.7717/peerj.20510)
Supplement: Supplemental Information 3 — Shoot length data for each treatment group and genotype. The values contributed to PCA and the evaluation of early-stage growth performance. [file peerj-13-20510-s003.xlsx]

## Sheet: Sheet1
Genotypes	Treatments	irradiation dose(Gy)	Root length (cm)
G1	CK	0	4.4
G1	CK	0	4.9
G1	CK	0	7.8
G1	CK	0	5.4
G1	CK	0	5.5
G1	CK	0	7.2
G1	CK	0	5.3
G1	CK	0	5.4
G1	CK	0	5.9
G1	CK	0	7.8
G1	CK	0	5.5
G1	CK	0	5.3
G1	CK	0	7
G1	CK	0	7.2
G1	CK	0	5.1
G1	CK	0	5.3
G1	CK	0	5.3
G1	CK	0	4.5
G1	CK	0	6.6
G1	CK	0	4
G1	CK	0	4.1
G1	CK	0	5.7
G1	CK	0	3.5
G1	CK	0	5.6
G1	CK	40	2
G1	CK	40	4.4
G1	CK	40	4
G1	CK	40	2
G1	CK	40	2.1
G1	CK	40	2.6
G1	CK	50	2.8
G1	CK	50	5.6
G1	CK	50	5.7
G1	CK	50	3.4
G1	CK	50	4.7
G1	CK	50	3.3
G1	CK	80	6.7
G1	CK	80	5.6
G1	CK	80	8.8
G1	CK	80	5.6
G1	CK	80	5.3
G1	CK	80	7.4
G1	CK	80	5
G1	CK	80	3.6
G1	CK	80	2.2
G1	NaCl	0	5.8
G1	NaCl	0	7.3
G1	NaCl	0	7.2
G1	NaCl	0	5
G1	NaCl	0	6
G1	NaCl	0	6.6
G1	NaCl	0	6.3
G1	NaCl	0	5.4
G1	NaCl	0	7.2
G1	NaCl	0	6.3
G1	NaCl	0	4.9
G1	NaCl	0	5.9
G1	NaCl	0	5.6
G1	NaCl	0	5.9
G1	NaCl	0	5.7
G1	NaCl	0	6.5
G1	NaCl	0	6.5
G1	NaCl	0	7.5
G1	NaCl	0	6.4
G1	NaCl	0	6.6
G1	NaCl	40	1
G1	NaCl	40	3.1
G1	NaCl	40	1.5
G1	NaCl	40	1.5
G1	NaCl	40	5
G1	NaCl	40	2.6
G1	NaCl	40	1.7
G1	NaCl	40	1
G1	NaCl	50	5.2
G1	NaCl	50	2.5
G1	NaCl	50	3.2
G1	NaCl	50	4.3
G1	NaCl	50	4.2
G1	NaCl	50	0.9
G1	NaCl	50	5.5
G1	NaCl	80	0
G2	CK	0	5.7
G2	CK	0	4.4
G2	CK	0	6.6
G2	CK	0	3.8
G2	CK	0	8
G2	CK	0	6.2
G2	CK	0	6.3
G2	CK	0	5
G2	CK	0	5.6
G2	CK	0	6.6
G2	CK	0	4.5
G2	CK	0	6.6
G2	CK	0	6.4
G2	CK	0	5.7
G2	CK	0	7.1
G2	CK	0	6.6
G2	CK	0	6.4
G2	CK	0	5.7
G2	CK	0	7.1
G2	CK	0	6
G2	CK	0	7
G2	CK	0	4.9
G2	CK	0	5.5
G2	CK	0	6.4
G2	CK	0	5.6
G2	CK	0	6.8
G2	CK	0	7
G2	CK	0	5.7
G2	CK	0	7.1
G2	CK	40	5.8
G2	CK	40	7
G2	CK	40	1
G2	CK	50	4.5
G2	CK	50	1.1
G2	CK	50	4.9
G2	CK	50	2.5
G2	CK	50	4.6
G2	CK	50	1.3
G2	CK	80	0
G2	NaCl	0	6.9
G2	NaCl	0	6.9
G2	NaCl	0	5.9
G2	NaCl	0	6.8
G2	NaCl	0	8.1
G2	NaCl	0	6.1
G2	NaCl	0	6.2
G2	NaCl	0	7
G2	NaCl	0	6.5
G2	NaCl	0	6.8
G2	NaCl	0	6.9
G2	NaCl	0	8.8
G2	NaCl	0	6
G2	NaCl	0	5.5
G2	NaCl	0	6.4
G2	NaCl	0	7.4
G2	NaCl	0	6.5
G2	NaCl	0	5.8
G2	NaCl	0	7
G2	NaCl	40	4.3
G2	NaCl	40	3.1
G2	NaCl	40	3.4
G2	NaCl	50	5.3
G2	NaCl	50	1.6
G2	NaCl	50	5.3
G2	NaCl	50	5
G2	NaCl	50	1.8
G2	NaCl	50	1.5
G2	NaCl	80	4.2
G2	NaCl	80	3.7
G2	NaCl	80	2.5
G3	CK	0	10.4
G3	CK	0	5.9
G3	CK	0	7
G3	CK	0	6.4
G3	CK	0	5
G3	CK	0	9.2
G3	CK	0	8.4
G3	CK	0	2.3
G3	CK	0	8.6
G3	CK	0	9.1
G3	CK	0	5.1
G3	CK	0	8.5
G3	CK	0	9
G3	CK	0	4
G3	CK	0	6.8
G3	CK	0	6.5
G3	CK	0	3.1
G3	CK	0	5.2
G3	CK	0	6.2
G3	CK	40	4.3
G3	CK	40	8
G3	CK	40	2.1
G3	CK	40	1
G3	CK	40	1
G3	CK	40	8.3
G3	CK	40	3.2
G3	CK	40	0.9
G3	CK	40	3.5
G3	CK	40	2.5
G3	CK	50	9.2
G3	CK	50	8.2
G3	CK	50	5.8
G3	CK	50	7.8
G3	CK	50	5.6
G3	CK	50	1.6
G3	CK	50	5.3
G3	CK	50	11.9
G3	CK	50	4.9
G3	CK	50	6.7
G3	CK	50	3.9
G3	CK	50	1.7
G3	CK	50	7.7
G3	CK	80	0
G3	NaCl	0	8
G3	NaCl	0	8.5
G3	NaCl	0	7.7
G3	NaCl	0	5.9
G3	NaCl	0	6.4
G3	NaCl	0	10.2
G3	NaCl	0	7.8
G3	NaCl	0	7.6
G3	NaCl	0	12.9
G3	NaCl	0	7.3
G3	NaCl	0	6.6
G3	NaCl	0	11.3
G3	NaCl	0	13.2
G3	NaCl	0	8.5
G3	NaCl	0	8.1
G3	NaCl	0	7.2
G3	NaCl	0	6
G3	NaCl	0	9.2
G3	NaCl	0	5
G3	NaCl	0	7.3
G3	NaCl	0	6.5
G3	NaCl	0	8.4
G3	NaCl	0	5.2
G3	NaCl	0	4.5
G3	NaCl	0	7.6
G3	NaCl	0	8.6
G3	NaCl	0	7.4
G3	NaCl	0	6.8
G3	NaCl	0	6.7
G3	NaCl	40	3
G3	NaCl	40	7.4
G3	NaCl	40	6.4
G3	NaCl	40	3.9
G3	NaCl	40	1.3
G3	NaCl	40	0.9
G3	NaCl	40	0.3
G3	NaCl	40	5
G3	NaCl	40	2
G3	NaCl	40	1.2
G3	NaCl	40	0.7
G3	NaCl	40	1.3
G3	NaCl	50	2.5
G3	NaCl	50	1.9
G3	NaCl	50	3
G3	NaCl	50	6.4
G3	NaCl	50	8.6
G3	NaCl	80	0
G4	CK	0	6.8
G4	CK	0	10.6
G4	CK	0	8
G4	CK	0	9.8
G4	CK	0	8.2
G4	CK	0	8.2
G4	CK	0	9.5
G4	CK	0	9.2
G4	CK	0	6.7
G4	CK	0	6.1
G4	CK	0	9.3
G4	CK	0	7.4
G4	CK	0	11.5
G4	CK	0	5.2
G4	CK	0	6.3
G4	CK	0	9.3
G4	CK	0	6.8
G4	CK	0	6.6
G4	CK	0	8.7
G4	CK	0	6.5
G4	CK	0	12.6
G4	CK	0	6.8
G4	CK	0	11.2
G4	CK	40	6.5
G4	CK	40	5.7
G4	CK	40	9.9
G4	CK	40	3
G4	CK	40	1.7
G4	CK	50	6
G4	CK	50	7.2
G4	CK	50	2.3
G4	CK	50	1.5
G4	CK	80	1
G4	NaCl	0	7.8
G4	NaCl	0	8.1
G4	NaCl	0	7.2
G4	NaCl	0	10.5
G4	NaCl	0	9.2
G4	NaCl	0	9.8
G4	NaCl	0	8.4
G4	NaCl	0	11.7
G4	NaCl	0	8
G4	NaCl	0	8.7
G4	NaCl	0	9.8
G4	NaCl	0	8
G4	NaCl	0	9.5
G4	NaCl	0	8.1
G4	NaCl	0	9.9
G4	NaCl	0	7.9
G4	NaCl	0	7.6
G4	NaCl	0	10
G4	NaCl	0	6.9
G4	NaCl	0	6.4
G4	NaCl	0	7.9
G4	NaCl	40	8.4
G4	NaCl	40	5.4
G4	NaCl	40	5.3
G4	NaCl	40	6.8
G4	NaCl	40	0.6
G4	NaCl	50	11.1
G4	NaCl	50	7.8
G4	NaCl	50	3.8
G4	NaCl	50	6.1
G4	NaCl	50	1.2
G4	NaCl	50	3.7
G4	NaCl	50	1.8
G4	NaCl	50	4.7
G4	NaCl	50	4.2
G4	NaCl	50	6.4
G4	NaCl	80	1.3
G4	NaCl	80	3
G4	NaCl	80	3
G5	CK	0	6.3
G5	CK	0	8.8
G5	CK	0	4.8
G5	CK	0	6.5
G5	CK	0	3.4
G5	CK	0	6.5
G5	CK	0	7.9
G5	CK	0	4.8
G5	CK	0	7.9
G5	CK	0	4.2
G5	CK	0	8.5
G5	CK	0	6.4
G5	CK	0	6.9
G5	CK	0	5.6
G5	CK	0	5.2
G5	CK	0	5.7
G5	CK	0	7
G5	CK	0	5.8
G5	CK	0	8.9
G5	CK	0	6.5
G5	CK	0	7.7
G5	CK	40	6.5
G5	CK	50	2.3
G5	CK	50	1.5
G5	CK	50	1.2
G5	CK	50	1
G5	CK	80	0
G5	NaCl	0	6.1
G5	NaCl	0	6
G5	NaCl	0	4.3
G5	NaCl	0	6
G5	NaCl	0	4.6
G5	NaCl	0	4.3
G5	NaCl	0	6.5
G5	NaCl	0	7.5
G5	NaCl	0	6.1
G5	NaCl	0	3.6
G5	NaCl	0	3.5
G5	NaCl	0	6.1
G5	NaCl	0	4.1
G5	NaCl	0	5.3
G5	NaCl	0	6.9
G5	NaCl	0	5.4
G5	NaCl	0	4.8
G5	NaCl	0	4.7
G5	NaCl	0	0.9
G5	NaCl	40	3.5
G5	NaCl	50	1.5
G5	NaCl	50	2.3
G5	NaCl	80	6.4
G6	CK	0	8.3
G6	CK	0	6.8
G6	CK	0	8.6
G6	CK	0	5
G6	CK	0	5.8
G6	CK	0	6.5
G6	CK	0	3.3
G6	CK	0	4.7
G6	CK	0	7.3
G6	CK	0	8.2
G6	CK	0	6.6
G6	CK	0	7.5
G6	CK	0	4.2
G6	CK	0	5.8
G6	CK	0	6.2
G6	CK	0	5.2
G6	CK	0	8.7
G6	CK	0	7.1
G6	CK	0	6.5
G6	CK	0	5.4
G6	CK	0	5.1
G6	CK	0	5
G6	CK	0	7.4
G6	CK	0	8.9
G6	CK	0	3
G6	CK	0	4.3
G6	CK	0	2.6
G6	CK	0	1.9
G6	CK	0	1.3
G6	CK	0	8.4
G6	CK	0	7.7
G6	CK	0	7
G6	CK	0	8
G6	CK	0	7
G6	CK	40	4.6
G6	CK	40	3.5
G6	CK	40	1.2
G6	CK	40	1
G6	CK	40	1.5
G6	CK	40	1.5
G6	CK	50	2.9
G6	CK	50	5.1
G6	CK	50	5.2
G6	CK	50	8.1
G6	CK	50	7.6
G6	CK	50	4.2
G6	CK	50	4.1
G6	CK	50	5.5
G6	CK	50	6.9
G6	CK	50	9.5
G6	CK	50	5.8
G6	CK	50	1.1
G6	CK	80	1.2
G6	NaCl	0	8
G6	NaCl	0	5
G6	NaCl	0	7.4
G6	NaCl	0	6.2
G6	NaCl	0	7.6
G6	NaCl	0	8.2
G6	NaCl	0	8.1
G6	NaCl	0	8.6
G6	NaCl	0	8.4
G6	NaCl	0	8.4
G6	NaCl	0	6.7
G6	NaCl	0	9.4
G6	NaCl	0	7.6
G6	NaCl	0	6.9
G6	NaCl	0	7.3
G6	NaCl	0	6.9
G6	NaCl	0	6.4
G6	NaCl	0	8.4
G6	NaCl	0	8.1
G6	NaCl	0	4.7
G6	NaCl	0	7.1
G6	NaCl	40	5.6
G6	NaCl	40	5
G6	NaCl	50	5
G6	NaCl	50	6.6
G6	NaCl	50	4.7
G6	NaCl	50	6
G6	NaCl	50	5.3
G6	NaCl	80	0
G7	CK	0	4.9
G7	CK	0	6.3
G7	CK	0	4.1
G7	CK	0	3.8
G7	CK	0	3.4
G7	CK	0	5
G7	CK	0	6.2
G7	CK	0	3
G7	CK	0	3
G7	CK	0	3.8
G7	CK	0	4.7
G7	CK	0	1.3
G7	CK	0	5.6
G7	CK	0	5.8
G7	CK	0	4.3
G7	CK	0	1.5
G7	CK	40	0
G7	CK	50	0
G7	CK	80	0
G8	CK	0	8.4
G8	CK	0	7
G8	CK	0	7.2
G8	CK	0	7.9
G8	CK	0	8.8
G8	CK	0	10.4
G8	CK	0	6.9
G8	CK	0	9.2
G8	CK	0	6.8
G8	CK	0	6.3
G8	CK	0	5.6
G8	CK	0	6.3
G8	CK	0	5.5
G8	CK	0	8.3
G8	CK	0	7.8
G8	CK	0	10.3
G8	CK	0	5.7
G8	CK	0	10.2
G8	CK	0	7.3
G8	CK	0	6.8
G8	CK	0	8.9
G8	CK	40	2.2
G8	CK	40	3.8
G8	CK	40	1
G8	CK	40	1
G8	CK	40	1.3
G8	CK	40	0.8
G8	CK	40	8.6
G8	CK	40	5.5
G8	CK	40	1.2
G8	CK	40	0.9
G8	CK	40	1.5
G8	CK	40	0.6
G8	CK	40	6.5
G8	CK	40	2.6
G8	CK	40	2.1
G8	CK	40	6.5
G8	CK	40	1.2
G8	CK	50	4.8
G8	CK	50	7
G8	CK	50	4.2
G8	CK	50	7.2
G8	CK	50	3.7
G8	CK	50	2.7
G8	CK	50	2.6
G8	CK	50	1.9
G8	CK	50	1.1
G8	CK	50	1
G8	CK	50	1.3
G8	CK	80	1.7
G8	CK	80	7
G8	CK	80	7
G8	CK	80	6.2
G8	CK	80	8.2
G8	CK	80	7.8
G8	CK	80	6.6
G8	CK	80	8.2
G8	CK	80	6.4
G8	CK	80	5.2
G8	CK	80	7.4
G8	CK	80	3.5
G8	CK	80	4.3
G8	NaCl	0	7.3
G8	NaCl	0	6.9
G8	NaCl	0	8.4
G8	NaCl	0	6.7
G8	NaCl	0	5.9
G8	NaCl	0	5.8
G8	NaCl	0	6.8
G8	NaCl	0	8.1
G8	NaCl	0	7.7
G8	NaCl	0	7.2
G8	NaCl	0	6.8
G8	NaCl	0	9
G8	NaCl	0	9.6
G8	NaCl	0	7
G8	NaCl	0	8.9
G8	NaCl	0	4.3
G8	NaCl	0	6.3
G8	NaCl	0	7.8
G8	NaCl	0	6.7
G8	NaCl	0	6.8
G8	NaCl	0	7.7
G8	NaCl	0	5.4
G8	NaCl	0	7.5
G8	NaCl	0	8.1
G8	NaCl	0	6
G8	NaCl	0	8
G8	NaCl	0	4.4
G8	NaCl	0	12.6
G8	NaCl	0	7.5
G8	NaCl	0	7.4
G8	NaCl	0	8.6
G8	NaCl	0	8
G8	NaCl	40	7
G8	NaCl	40	5.5
G8	NaCl	40	4.3
G8	NaCl	40	6.1
G8	NaCl	40	4.3
G8	NaCl	40	3
G8	NaCl	40	5.6
G8	NaCl	40	4.5
G8	NaCl	40	7
G8	NaCl	40	5
G8	NaCl	40	4.6
G8	NaCl	40	2.8
G8	NaCl	40	1.1
G8	NaCl	40	6.2
G8	NaCl	40	1.4
G8	NaCl	40	0.7
G8	NaCl	50	6.3
G8	NaCl	50	5.6
G8	NaCl	50	6.5
G8	NaCl	50	5.8
G8	NaCl	50	6.5
G8	NaCl	50	5.8
G8	NaCl	50	8.8
G8	NaCl	50	6.4
G8	NaCl	50	6.8
G8	NaCl	50	1.8
G8	NaCl	50	5.8
G8	NaCl	50	6
G8	NaCl	50	0.7
G8	NaCl	80	0
G9	CK	0	5.4
G9	CK	0	6
G9	CK	0	9.5
G9	CK	0	6.7
G9	CK	0	7.2
G9	CK	0	1.2
G9	CK	0	7.3
G9	CK	0	5.3
G9	CK	0	6.3
G9	CK	0	6.6
G9	CK	0	7.2
G9	CK	0	1.9
G9	CK	0	6.2
G9	CK	0	8.7
G9	CK	0	8.5
G9	CK	0	5.1
G9	CK	40	1.8
G9	CK	50	4.9
G9	CK	80	0
G9	NaCl	0	2
G9	NaCl	0	6.3
G9	NaCl	0	5.2
G9	NaCl	0	8.3
G9	NaCl	0	10.8
G9	NaCl	0	6.6
G9	NaCl	0	7
G9	NaCl	0	6.5
G9	NaCl	0	5.5
G9	NaCl	0	1.2
G9	NaCl	40	1.3
G9	NaCl	40	3.7
G9	NaCl	40	1.1
G9	NaCl	50	5.4
G9	NaCl	80	0
